# Supplementary material for: Keeping Candida commensal: how lactobacilli antagonize pathogenicity of Candida albicans in an in vitro gut model
Source: PubMed Central journal article supplement (PMC6765188; doi:10.1242/dmm.039719), 2019-09-01
Supplement: dmm-12-039719-s1.pdf [file dmm-12-039719-s1.pdf]

## Supplement

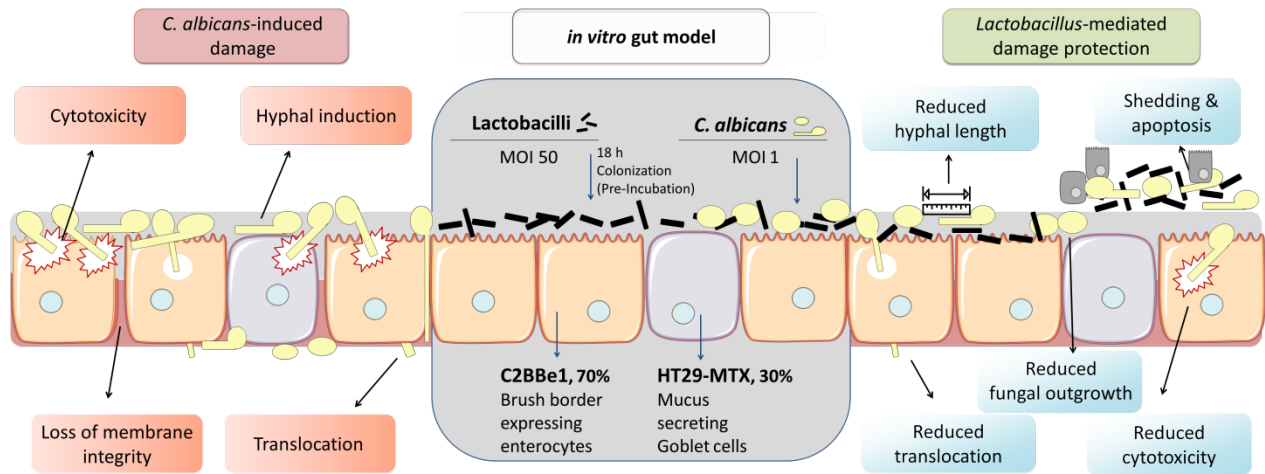

Figure S1: graphical abstract to visualize the written abstract.

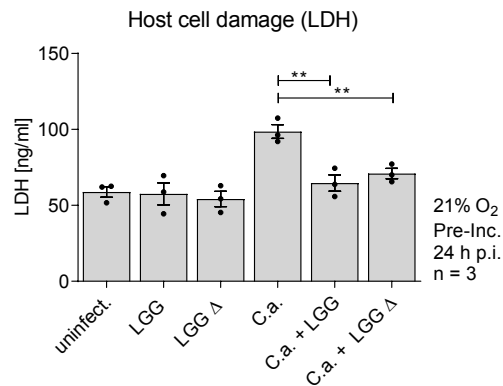

Figure S2: The protective effect of *L. rhamnosus* is independent of exopolysaccharides. LDH release at 24 h post-infection of IECs left untreated, colonized either with the *L. rhamnosus* GG mutant ((LGG $\Delta$ ) lacking exopolysaccharides), or the corresponding WT strain (LGG) and infected with *C. albicans* (MOI 1) or not. The results were normalized to *C. albicans* single infection. Results shown are the mean values  $\pm$  SEM, \* $p$  < 0.05, \*\*\* $p$  < 0.005.

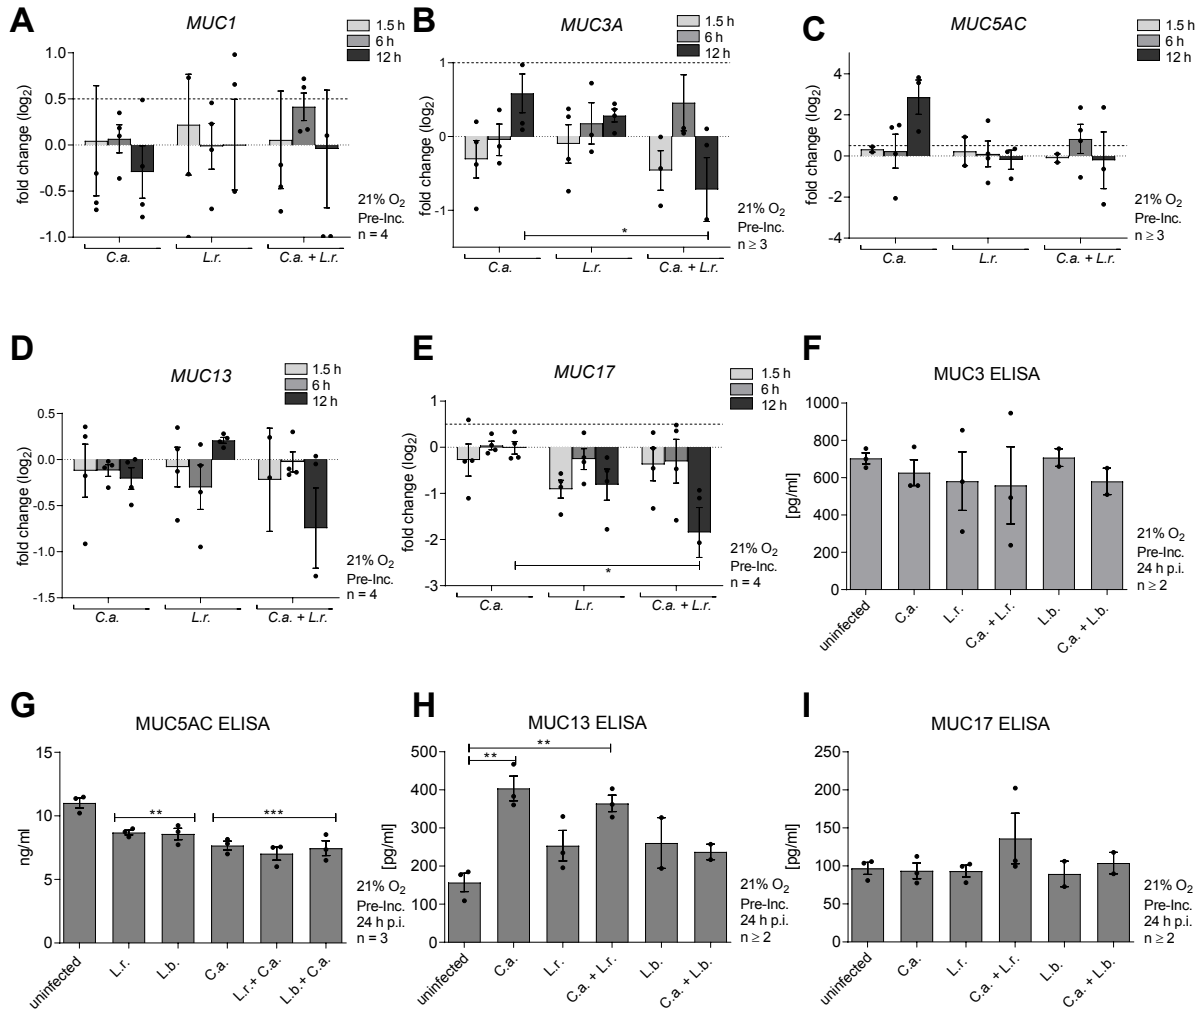

**Figure S3: The protective effect of lactobacilli does not correlate with altered mucus secretion.** The relative mRNA expression of (A) *MUC1*, (B) *MUC3A*, (C) *MUC5AC*, (D) *MUC13*, and (E) *MUC17* in IECs either left untreated or colonized with *L. rhamnosus* (MOI 50) and infected or not with *C. albicans* (MOI 1) for 1.5, 6, or 12 h. Expression levels were normalized to the reference genes *ACT1* and *GAPDH*. Results shown are the mean values  $\pm$  SEM. \* $p < 0.05$ , \*\* $p < 0.01$ , \*\*\* $p < 0.005$ . (F-I) Protein concentrations of (F) MUC3, (G) MUC5AC, (H) MUC13, and (I) MUC17 quantified in whole cell lysate of IECs left untreated or colonized with lactobacilli (*L. rhamnosus* or *L. brevis*; MOI 50) and infected or not with *C. albicans* for 24 h. Results shown are the mean values  $\pm$  SEM. \* $p < 0.05$ , \*\* $p < 0.01$ , \*\*\* $p < 0.005$  compared to uninfected host cells.

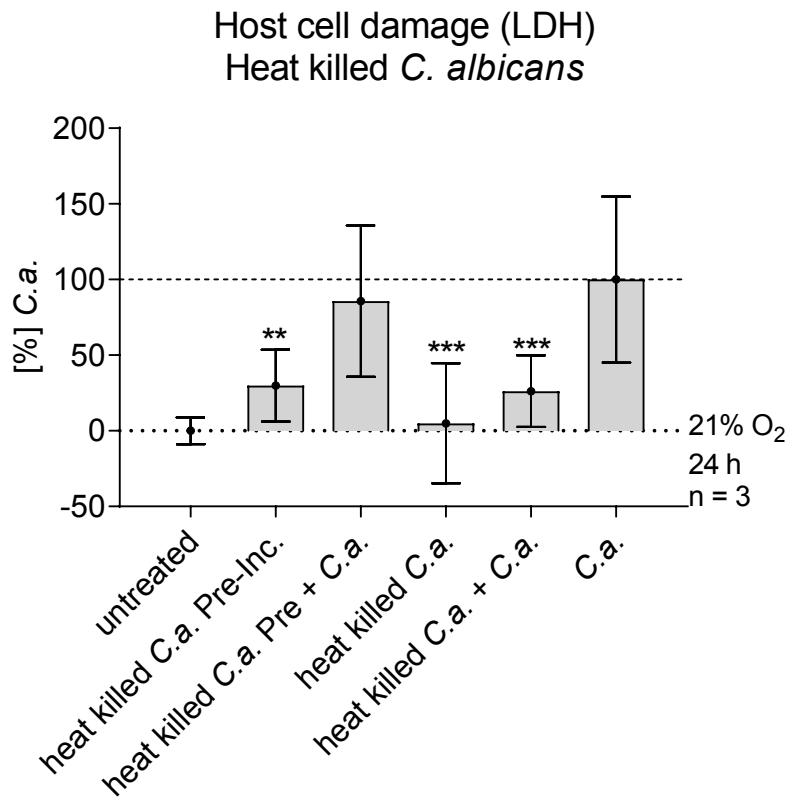

**Figure S4: Protective effect through high biomass of heat-killed *C. albicans*.** LDH release at 24 h post-infection of IECs colonized or not with heat-killed *C. albicans* (MOI 100) and infected with *C. albicans* (MOI 1) or not. The results were normalized to *C. albicans* single infection.

| Experiment                                            | Format                   | initial No of IECs/well (volume) | CFU C.a./well (volume)      | CFU lactobacilli/well [excess compared to C.a.] (volume)                                                | total medium | incubation period    |
|-------------------------------------------------------|--------------------------|----------------------------------|-----------------------------|---------------------------------------------------------------------------------------------------------|--------------|----------------------|
| Cytotoxicity (LDH assay)                              | 96 well plate            | 2×10 <sup>4</sup> (50 µl)        | 2×10 <sup>4</sup> (50 µl)   | 1×10 <sup>5</sup> [5x] (50 µl)<br>1×10 <sup>6</sup> [50x] (50 µl)<br>5×10 <sup>6</sup> [250x] (50 µl)   | 150 µl       | 24 or 48 h           |
| Adhesion of <i>C. albicans</i>                        | 24 well plate coverslips | 1×10 <sup>5</sup> (125 µl)       | 5×10 <sup>4</sup> (125 µl)  | 2.5×10 <sup>6</sup> [50x] (125 µl)                                                                      | 375 µl       | 1 h                  |
| Hypheal length                                        | 24 well plate coverslips | 1×10 <sup>5</sup> (125 µl)       | 5×10 <sup>4</sup> (125 µl)  | 2.5×10 <sup>6</sup> [50x] (125 µl)                                                                      | 375 µl       | 4 h                  |
| Translocation, TEER                                   | transwell inserts        | 2×10 <sup>4</sup> (50 µl)        | 2×10 <sup>4</sup> (50 µl)   | 1×10 <sup>6</sup> [50x] (150 µl)                                                                        | 250 µl       | 24 h                 |
| cell-free supernatants                                | 96 well plate            | 2×10 <sup>4</sup> (0 µl)         | 2×10 <sup>4</sup> (10 µl)   | -<br>undiluted SN 140 µl                                                                                | 150 µl       | 24 h                 |
| killed lactobacilli (pre-incubation)                  | 96 well plate            | 2×10 <sup>4</sup> (50 µl)        | 2×10 <sup>4</sup> (50 µl)   | 1×10 <sup>6</sup> [50x] (50 µl)                                                                         | 150 µl       | 24 h                 |
| killed lactobacilli (simult. infection), displacement | 96 well plate            | 2×10 <sup>4</sup> (50 µl)        | 2×10 <sup>4</sup> (50 µl)   | 1×10 <sup>6</sup> [50x] (50 µl)<br>5×10 <sup>6</sup> [250x] (50 µl)<br>1×10 <sup>7</sup> [500x] (50 µl) | 150 µl       | 24 h                 |
| Growth of lactobacilli in IECs                        | 24 well plate            | 1×10 <sup>5</sup> (125 µl)       | 5×10 <sup>4</sup> (0 µl)    | 2.0×10 <sup>3</sup> [-10x] (1000 µl)                                                                    | 1000 µl      | 24 h                 |
| Western Blot                                          | 6 well plate             | 4×10 <sup>5</sup> (1300 µl)      | 4×10 <sup>5</sup> (1300 µl) | 2.0×10 <sup>7</sup> [50x] (1300 µl)                                                                     | 3900 µl      | 6 h, 12 h, 24 h      |
| Glucose- and Lactate measurement                      | 6 well plate             | 4×10 <sup>5</sup> (1300 µl)      | 4×10 <sup>5</sup> (1300 µl) | 2.0×10 <sup>7</sup> [50x] (1300 µl)                                                                     | 3900 µl      | 0 h, 6 h, 12 h, 24 h |
| <i>C.a.</i> shedding                                  | 6 well plate             | 4×10 <sup>5</sup> (1300 µl)      | 4×10 <sup>5</sup> (1300 µl) | 2.0×10 <sup>7</sup> [50x] (1300 µl)                                                                     | 3900 µl      | 1 h, 3 h, 6 h, 24 h  |
| SEM                                                   | 24 well plate coverslips | 1×10 <sup>5</sup> (125 µl)       | 5×10 <sup>4</sup> (125 µl)  | 2.5×10 <sup>6</sup> [50x] (125 µl)                                                                      | 375 µl       | 6 h                  |
| ELISA                                                 | 24 well plate            | 1×10 <sup>5</sup> (125 µl)       | 5×10 <sup>4</sup> (125 µl)  | 2.5×10 <sup>6</sup> [50x] (125 µl)                                                                      | 375 µl       | 24 h                 |
| RNA isolation                                         | 6 well plate             | 4×10 <sup>5</sup> (1300 µl)      | 4×10 <sup>5</sup> (1300 µl) | 2.0×10 <sup>7</sup> [50x] (1300 µl)                                                                     | 3900 µl      | 1.5 h, 6 h, 12 h     |
| Apoptosis                                             | 96 well plate            | 2×10 <sup>4</sup> (50 µl)        | 2×10 <sup>4</sup> (50 µl)   | 1×10 <sup>6</sup> [50x] (50 µl)                                                                         | 150 µl       | 0 h-24 h             |

**Table S1: Overview of the exact number of host cells, *Lactobacillus* species, *C. albicans*, and incubation periods used in the respective experiments.**

| target gene    | sequence                                            | target gene    | sequence                                            |
|----------------|-----------------------------------------------------|----------------|-----------------------------------------------------|
| <i>β-ACTIN</i> | F: AAATGCTTCTAGGCGGACTAT<br>R: AAGGGACTTCTGTAACAACG | <i>MUC13</i>   | F: GAGCTTGCAACCTAGCCTCA<br>R: AGAGTGCACCCCATAGTGGA  |
| <i>GAPDH</i>   | F: TTGCCCTCAACGACCACTTT<br>R: GGTGGTCCAGGGGTCTTACT  | <i>MUC17</i>   | F: TTGTCAGCACCACACTTCCA<br>R: GGCAGTGTCTAGTAGAAGGGG |
| <i>MUC1</i>    | F: CAGTGCCGCCGAAAGAACTA<br>R: TAGGGGCTACGATCGGTACT  | <i>cFOS</i>    | F: GGAGGAGGGGAGCTGACTGAT<br>R: GCTGCCAGGATGAACCTAGT |
| <i>MUC2</i>    | F: CACTGCCCTCGACAGCTTTA<br>R: TGGAAGCAAGGACTGAACAA  | <i>DUSP1</i>   | F: CTGCAGTTTGAGTCCCAGGT<br>R: AGACGGGGAAGTTGAACACG  |
| <i>MUC3A</i>   | F: TCACATCCTGGTCCCTAGCA<br>R: TGAATGGACGGGCTCAGAAG  | <i>DUSP5</i>   | F: TGGAAGACAGCCACACGG<br>R: GAGATCCCAGCCTCACAGTG    |
| <i>MUC4</i>    | F: CAGCTCCTGGGCTGAACATT<br>R: CTCGTGTGAAGTCCGATGCT  | <i>NFκB-IA</i> | F: ACCTCACCTTTGTGGGGTTT<br>R: ACAGGATACCACTGGGGTCA  |
| <i>MUC5AC</i>  | F: GTACTCGCTCGAGGGCAACA<br>R: TTCCACCTCGGTGTAGCTGA  |                |                                                     |

**Table S2: Primers used for gene expression analyses**
